# Supplementary material for: COVID-19 Pandemic Related Research in Africa: Bibliometric Analysis of Scholarly Output, Collaborations and Scientific Leadership
Source: MDPI journal article supplement (doi:10.3390/ijerph18147273), 2021-07-07
Supplement: s1 [file s1]

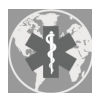

Article

## Supplementary Materials

# COVID-19 Pandemic Related Research in Africa: Bibliometric Analysis of Scholarly Output, Collaborations and Scientific Leadership

Maxime Descartes Mbogning Fonkou <sup>1,†</sup>, Nicola Luigi Bragazzi <sup>2,†</sup>, Emmanuel Kagning Tsinda <sup>3</sup>, Yagai Bouba <sup>4</sup>, Gideon Sadikiel Mmbando <sup>5</sup> and Jude Dzevela Kong <sup>6,\*</sup>

<sup>1</sup> UFR IM2AG, Université Grenoble Alpes, 38000 Grenoble, France; dmbogning15@gmail.com

<sup>2</sup> Laboratory for Industrial and Applied Mathematics (LIAM), Department of Mathematics and Statistics, York University, Toronto, ON M3J 1P3, Canada; robertobragazzi@gmail.com

<sup>3</sup> Graduate School of Medicine, University of Tohoku, Sendai 980-8575, Japan; kagningemmanuel@gmail.com

<sup>4</sup> Chantal BIYA International Reference Centre for Research on HIV/AIDS Prevention and Management (CIRCB), Yaoundé 3077, Cameroon; romeobouba@yahoo.fr

<sup>5</sup> Graduate School of Life Sciences, University of Tohoku, Sendai 980-8577, Japan; gideonmmbando@gmail.com

<sup>6</sup> Canadian Centre for Disease Modelling (CCDM), Department of Mathematics and Statistics, York University, Toronto, ON M3J 1P3, Canada

\* Correspondence: jdkong@yorku.ca; Tel.: +1-(416)-736-2100 (ext. 66093)

† Equally contributed as first authors.

## 1. Supplementary Data S1

### 1.1. Search Terms:

#### 1.1.1. African Countries and Main Cities:

("Algeria" OR "Algerien" OR "Algerie" OR "Algiers" OR "Alger" OR "Angola" OR "Bangui" OR "Republique centrafricaine" OR "Central African Republic" OR "Benin" OR "Dahomey" OR "Benin" OR "Porto-Novo" OR "Botswana" OR "Kalahari" OR "Gaborone" OR "Burkina Faso" OR "Burkina" OR "Ouagadougou" OR "Banfora" OR "Bobo Dioulasso" OR "Burundi" OR "Bujumbura" OR "Gitega" OR "Cameroon" OR "Cameroun" OR "Yaounde" OR "Douala" OR "Bafoussam" OR "Bamenda" OR "Garoua" OR "Maroua" OR "Cape Verde" OR "Cabo Verde" OR "Praia" OR "Chad" OR "Tchad" OR "N'Djamena" OR "Tschad" OR "Comoros" OR "Comores" OR "Congo" OR "Republic of the Congo" OR "Kongo" OR "Brazzaville" OR "Cote d'Ivoire" OR "Ivory Coast" OR "Cote d'Ivoire" OR "Yamoussoukro" OR "Abidjan" OR "Bouake" OR "Korhogo" OR "Democratic Republic of the Congo" OR "Kinshasa" OR "Zaire" OR "Republique democratique du Congo" OR "Djibouti" OR "Egypt" OR "Malawi" OR "Cairo" OR "Al Minya" OR "Equatorial Guinea" OR "Guinee equatoriale" OR "Malabo" OR "Eritrea" OR "Asmara" OR "Ethiopia" OR "Ethiopie" OR "Addis Ababa" OR "Gabon" OR "Gabonese Republic" OR "Libreville" OR "Gambia" OR "Gambie" OR "Banjul" OR "Ghana" OR "Accra" OR "Takoradi" OR "Sekondi" OR "Koforidua" OR "Obuasi" OR "Kumasi" OR "Tamale" OR "Republic of Guinea" OR "Guinea" OR "Guinee" OR "Conakry" OR "Guinea-Bissau" OR "Guine-Bissau" OR "Bissau" OR "Kenya" OR "Kenia" OR "Nairobi" OR "Mombasa" OR "Lesotho" OR "Maseru" OR "Liberia" OR "Republic of Liberia" OR "Liberia" OR "Libya" OR "Libya" OR "Libye" OR "Libia" OR "Madagascar" OR "Madagaskar" OR "Madagasikara" OR "Antananarivo" OR "Toliara" OR "Fianarantsoa" OR "Antsirabe" OR "Toamasina" OR "Mahajanga" OR "Malawi" OR "Malawi" OR "Lilongwe" OR "Mali" OR "Bamako" OR "Sikasso" OR "Koutiala" OR "Koulikoro" OR "Segou" OR "Kayes" OR "Mopti" OR

"Mauritania" OR "Mauritanie" OR "Nouakchott" OR "Mauritius" OR "Ile Maurice" OR "Morocco" OR "Morocco" OR "Maroc" OR "Marruecos" OR "Rabat" OR "casablanca" OR "Mozambique" OR "Mosambik" OR "Mocambique" OR "Maputo" OR "Namibia" OR "Namibie" OR "Windhoek" OR "Niger" OR "Niamey" OR "Maradi" OR "Zinder" OR "Tillaberi" OR "Tahoua" OR "Agadez" OR "Nigeria" OR "Abuja" OR "Rwanda" OR "Ruanda" OR "Kigali" OR "Sao Tome" OR "Sao Tome" OR "Senegal" OR "Senegal" OR "Dakar" OR "Ziguinchor" OR "Seychelles" OR "Sierra Leone" OR "Somalia" OR "Somalie" OR "Mogadishu" OR "South Africa" OR "Afrique du Sud" OR "Pretoria" OR "Stellenbosch" OR "Cape Town" OR "Johannesburg" OR "South Sudan" OR "Sudsudan" OR "Juba" OR "Sudan" OR "Soudan" OR "Khartoum" OR "Swaziland" OR "eSwatini" OR "Mbabane" OR "Tanzania" OR "Zanzibar" OR "Tanganyika" OR "Tansania" OR "Tanzanie" OR "Dodoma" OR "Togo" OR "Lome" OR "Tunisia" OR "Tunesien" OR "Tunisie" OR "Tunis" OR "Gabes" OR "Uganda" OR "Ouganda" OR "Kampala" OR "Zambia" OR "Rhodesia" OR "Sambia" OR "Zambie" OR "Lusaka" OR "Zimbabwe" OR "Simbabwe" OR "Harare").

#### 1.1.2. Terms Related to COVID:

"sars cov 2" OR "covid" OR "COVID 19" OR "COVID 19" OR "ncov" OR "2019 ncov" OR "2019nCoV" OR "novel coronavirus" OR "COVID 19" OR "covid19" OR "covid" OR "new coronavirus" OR "new corona virus" OR "novel corona virus" OR ("Wuhan" AND ("coronavirus" OR "coronavirus" OR "coronaviruses")) OR "sars cov" OR "Coronavirus Disease" OR "SARS-Cov2" OR "Coronavirus 2" OR "2019 coronavirus" OR "coronavirus 2019" OR "Corona Virus Disease" OR "SARS coronavirus" OR "Coronavirus pandemic" OR "coronavirus outbreak\*" OR "china corona\*" OR "coronavirus" OR "coronaviruses" OR "corona virus".

## 1.2. Search Queries for Each Bibliographic Database:

## 1.2.1. WOS Search Query

|    |                                                                                                                                                                                                                                                                                                                                                                                                                                                                                                                                                                                                                                                                                                                                                                                                                                                                                                                                                                                                                                                                                                                                                                                                                                                                                                                                                                                                                                                                                                                                                                                                                                                                                                                                                                                                                                                                                                                                                                                                                                                                                                                                                                                                                                                                                                                                                                                                                                                                                                                                                                                                                                                                                                                                                                                                                                                                                                                                                                                                                                                                                                                            |
|----|----------------------------------------------------------------------------------------------------------------------------------------------------------------------------------------------------------------------------------------------------------------------------------------------------------------------------------------------------------------------------------------------------------------------------------------------------------------------------------------------------------------------------------------------------------------------------------------------------------------------------------------------------------------------------------------------------------------------------------------------------------------------------------------------------------------------------------------------------------------------------------------------------------------------------------------------------------------------------------------------------------------------------------------------------------------------------------------------------------------------------------------------------------------------------------------------------------------------------------------------------------------------------------------------------------------------------------------------------------------------------------------------------------------------------------------------------------------------------------------------------------------------------------------------------------------------------------------------------------------------------------------------------------------------------------------------------------------------------------------------------------------------------------------------------------------------------------------------------------------------------------------------------------------------------------------------------------------------------------------------------------------------------------------------------------------------------------------------------------------------------------------------------------------------------------------------------------------------------------------------------------------------------------------------------------------------------------------------------------------------------------------------------------------------------------------------------------------------------------------------------------------------------------------------------------------------------------------------------------------------------------------------------------------------------------------------------------------------------------------------------------------------------------------------------------------------------------------------------------------------------------------------------------------------------------------------------------------------------------------------------------------------------------------------------------------------------------------------------------------------------|
| #3 | <p>#1 AND #2</p> <p>Databases = WOS, CCC, KJD, MEDLINE, RSCI, SCIELO Timespan = 2019–2021</p> <p>Search language = Auto</p>                                                                                                                                                                                                                                                                                                                                                                                                                                                                                                                                                                                                                                                                                                                                                                                                                                                                                                                                                                                                                                                                                                                                                                                                                                                                                                                                                                                                                                                                                                                                                                                                                                                                                                                                                                                                                                                                                                                                                                                                                                                                                                                                                                                                                                                                                                                                                                                                                                                                                                                                                                                                                                                                                                                                                                                                                                                                                                                                                                                                |
| #2 | <p>AD = ("Algeria" OR "Algerien" OR "Algerie" OR "Algiers" OR "Alger" OR "Angola" OR "Bangui" OR "Republique centrafricaine" OR "Central African Republic" OR "Benin" OR "Dahomey" OR "Benin" OR "Porto-Novo" OR "Botswana" OR "Kalahari" OR "Gaborone" OR "Burkina Faso" OR "Burkina" OR "Ouagadougou" OR "Banfora" OR "Bobo Dioulasso" OR "Burundi" OR "Bujumbura" OR "Gitega" OR "Cameroon" OR "Cameroun" OR "Yaounde" OR "Douala" OR "Bafoussam" OR "Bamenda" OR "Garoua" OR "Maroua" OR "Cape Verde" OR "Cabo Verde" OR "Praia" OR "Chad" OR "Tchad" OR "N'Djamena" OR "Tschad" OR "Comoros" OR "Comores" OR "Congo" OR "Republic of the Congo" OR "Kongo" OR "Brazzaville" OR "Cote d'Ivoire" OR "Ivory Coast" OR "Cote d'Ivoire" OR "Yamoussoukro" OR "Abidjan" OR "Bouake" OR "Korhogo" OR "Democratic Republic of the Congo" OR "Kinshasa" OR "Zaire" OR "Republique democratique du Congo" OR "Djibouti" OR "Egypt" OR "Malawi" OR "Cairo" OR "Al Minya" OR "Equatorial Guinea" OR "Guinee equatoriale" OR "Malabo" OR "Eritrea" OR "Asmara" OR "Ethiopia" OR "Ethiopie" OR "Addis Ababa" OR "Gabon" OR "Gabonese Republic" OR "Libreville" OR "Gambia" OR "Gambie" OR "Banjul" OR "Ghana" OR "Accra" OR "Takoradi" OR "Sekondi" OR "Koforidua" OR "Obuasi" OR "Kumasi" OR "Tamale" OR "Republic of Guinea" OR "Guinea" OR "Guinee" OR "Conakry" OR "Guinea-Bissau" OR "Guine-Bissau" OR "Bissau" OR "Kenya" OR "Kenia" OR "Nairobi" OR "Mombasa" OR "Lesotho" OR "Maseru" OR "Liberia" OR "Republic of Liberia" OR "Liberia" OR "Libya" OR "Libya" OR "Libye" OR "Libia" OR "Madagascar" OR "Madagaskar" OR "Madagasikara" OR "Antananarivo" OR "Toliara" OR "Fianarantsoa" OR "Antsirabe" OR "Toamasina" OR "Mahajanga" OR "Malawi" OR "Malawi" OR "Lilongwe" OR "Mali" OR "Bamako" OR "Sikasso" OR "Koutiala" OR "Koulikoro" OR "Segou" OR "Kayes" OR "Mopti" OR "Mauritania" OR "Mauritanie" OR "Nouakchott" OR "Mauritius" OR "Ile Maurice" OR "Morocco" OR "Morocco" OR "Maroc" OR "Marruecos" OR "Rabat" OR "casablanca" OR "Mozambique" OR "Mosambik" OR "Mocambique" OR "Maputo" OR "Namibia" OR "Namibie" OR "Windhoek" OR "Niger" OR "Niamey" OR "Maradi" OR "Zinder" OR "Tillaberi" OR "Tahoua" OR "Agadez" OR "Nigeria" OR "Abuja" OR "Rwanda" OR "Ruanda" OR "Kigali" OR "Sao Tome" OR "Sao Tome" OR "Senegal" OR "Senegal" OR "Dakar" OR "Ziguinchor" OR "Seychelles" OR "Sierra Leone" OR "Somalia" OR "Somalie" OR "Mogadishu" OR "South Africa" OR "Afrique du Sud" OR "Pretoria" OR "Stellenbosch" OR "Cape Town" OR "Johannesburg" OR "South Sudan" OR "Sudsudan" OR "Juba" OR "Sudan" OR "Soudan" OR "Khartoum" OR "Swaziland" OR "eSwatini" OR "Mbabane" OR "Tanzania" OR "Zanzibar" OR "Tanganyika" OR "Tansania" OR "Tanzanie" OR "Dodoma" OR "Togo" OR "Lome" OR "Tunisia" OR "Tunesien" OR "Tunisie" OR "Tunis" OR "Gabes" OR "Uganda" OR "Ouganda" OR "Kampala" OR "Zambia" OR "Rhodesia" OR "Sambia" OR "Zambie" OR "Lusaka" OR "Zimbabwe" OR "Simbabwe" OR "Harare")</p> <p>Databases = WOS, CCC, KJD, MEDLINE, RSCI, SCIELO Timespan = 2019–2021</p> <p>Search language = Auto</p> |
| #1 | <p>TI = ("sars cov 2" OR "covid" OR "COVID 19" OR "COVID 19" OR "ncov" OR "2019 ncov" OR "2019nCoV" OR "novel coronavirus" OR "COVID 19" OR "covid19" OR "covid" OR "new coronavirus" OR "new corona virus" OR "novel corona virus" OR ("Wuhan" AND ("coronavirus" OR "coronavirus" OR "coronaviruses")) OR "sars cov" OR "Coronavirus Disease" OR "SARS-Cov2" OR "Coronavirus 2" OR "2019 coronavirus" OR "coronavirus 2019" OR "Corona Virus Disease" OR "SARS coronavirus" OR "Coronavirus pandemic" OR "coronavirus outbreak*" OR "china corona*" OR "coronavirus" OR "coronaviruses" OR "corona virus")</p> <p>Databases = WOS, CCC, KJD, MEDLINE, RSCI, SCIELO Timespan = 2019–2021</p> <p>Search language = Auto</p>                                                                                                                                                                                                                                                                                                                                                                                                                                                                                                                                                                                                                                                                                                                                                                                                                                                                                                                                                                                                                                                                                                                                                                                                                                                                                                                                                                                                                                                                                                                                                                                                                                                                                                                                                                                                                                                                                                                                                                                                                                                                                                                                                                                                                                                                                                                                                                                                |

## 1.2.2. PubMed Search Query

|    |                                                                                                                                                                                                                                                                                                                                                                                                                                                                                                                                                                                                                                                                                                                                                                                                                                                                                                                                                                                                                                                                                                                                                                                                                                                                                                                                                                                                                                                                                                                                                                                                                                                                                                                                                                                                                                                                                                                                                                                                                                                                                                                                                                                                                                                                                                                                                                                                                                                                                                                                                                                                                                                                                                                                                                                                                                                                                                                                                                                                                                                                                                                                                                                                                                                                                                                                                                                                                                                                                        |
|----|----------------------------------------------------------------------------------------------------------------------------------------------------------------------------------------------------------------------------------------------------------------------------------------------------------------------------------------------------------------------------------------------------------------------------------------------------------------------------------------------------------------------------------------------------------------------------------------------------------------------------------------------------------------------------------------------------------------------------------------------------------------------------------------------------------------------------------------------------------------------------------------------------------------------------------------------------------------------------------------------------------------------------------------------------------------------------------------------------------------------------------------------------------------------------------------------------------------------------------------------------------------------------------------------------------------------------------------------------------------------------------------------------------------------------------------------------------------------------------------------------------------------------------------------------------------------------------------------------------------------------------------------------------------------------------------------------------------------------------------------------------------------------------------------------------------------------------------------------------------------------------------------------------------------------------------------------------------------------------------------------------------------------------------------------------------------------------------------------------------------------------------------------------------------------------------------------------------------------------------------------------------------------------------------------------------------------------------------------------------------------------------------------------------------------------------------------------------------------------------------------------------------------------------------------------------------------------------------------------------------------------------------------------------------------------------------------------------------------------------------------------------------------------------------------------------------------------------------------------------------------------------------------------------------------------------------------------------------------------------------------------------------------------------------------------------------------------------------------------------------------------------------------------------------------------------------------------------------------------------------------------------------------------------------------------------------------------------------------------------------------------------------------------------------------------------------------------------------------------------|
| #3 | #1 AND #2                                                                                                                                                                                                                                                                                                                                                                                                                                                                                                                                                                                                                                                                                                                                                                                                                                                                                                                                                                                                                                                                                                                                                                                                                                                                                                                                                                                                                                                                                                                                                                                                                                                                                                                                                                                                                                                                                                                                                                                                                                                                                                                                                                                                                                                                                                                                                                                                                                                                                                                                                                                                                                                                                                                                                                                                                                                                                                                                                                                                                                                                                                                                                                                                                                                                                                                                                                                                                                                                              |
| #2 | Search: "sars cov 2"[Title] OR "covid"[Title] OR "COVID 19"[Title] OR "COVID 19"[Title] OR "ncov"[Title] OR "2019 ncov"[Title] OR "2019nCoV"[Title] OR "novel coronavirus"[Title] OR "COVID 19"[Title] OR "covid19"[Title] OR "covid"[Title] OR "new coronavirus"[Title] OR "new corona virus"[Title] OR "novel corona virus"[Title] OR ("Wuhan"[Title] AND ("coronavirus"[Title] OR "coronavirus"[Title] OR "coronaviruses"))[Title] OR "sars cov"[Title] OR "Coronavirus Disease"[Title] OR "SARS-Cov2"[Title] OR "Coronavirus 2"[Title] OR "2019 coronavirus"[Title] OR "coronavirus 2019"[Title] OR "Corona Virus Disease"[Title] OR "SARS coronavirus"[Title] OR "Coronavirus pandemic"[Title] OR "coronavirus outbreak*"[Title] OR "china corona*"[Title] OR "coronavirus"[Title] OR "coronaviruses"[Title] OR "corona virus"[Title] Filters: from 2019/12 - 2021/3 Sort by: Publication Date                                                                                                                                                                                                                                                                                                                                                                                                                                                                                                                                                                                                                                                                                                                                                                                                                                                                                                                                                                                                                                                                                                                                                                                                                                                                                                                                                                                                                                                                                                                                                                                                                                                                                                                                                                                                                                                                                                                                                                                                                                                                                                                                                                                                                                                                                                                                                                                                                                                                                                                                                                                    |
| #1 | Search: "Algeria"[Affiliation] OR "Algerien"[Affiliation] OR "Algerie"[Affiliation] OR "Algiers"[Affiliation] OR "Alger"[Affiliation] OR "Angola"[Affiliation] OR "Bangui"[Affiliation] OR "Republique centrafricaine"[Affiliation] OR "Central African Republic"[Affiliation] OR "Benin"[Affiliation] OR "Dahomey"[Affiliation] OR "Benin"[Affiliation] OR "Porto-Novo"[Affiliation] OR "Botswana"[Affiliation] OR "Kalahari"[Affiliation] OR "Gaborone"[Affiliation] OR "Burkina Faso"[Affiliation] OR "Burkina"[Affiliation] OR "Ouagadougou"[Affiliation] OR "Banfora"[Affiliation] OR "Bobo Dioulasso"[Affiliation] OR "Burundi"[Affiliation] OR "Bujumbura"[Affiliation] OR "Gitega"[Affiliation] OR "Cameroon"[Affiliation] OR "Cameroun"[Affiliation] OR "Yaounde"[Affiliation] OR "Douala"[Affiliation] OR "Bafoussam"[Affiliation] OR "Bamenda"[Affiliation] OR "Garoua"[Affiliation] OR "Maroua"[Affiliation] OR "Cape Verde"[Affiliation] OR "Cabo Verde"[Affiliation] OR "Praia"[Affiliation] OR "Chad"[Affiliation] OR "Tchad"[Affiliation] OR "N'Djamena"[Affiliation] OR "Tschad"[Affiliation] OR "Comoros"[Affiliation] OR "Comores"[Affiliation] OR "Congo"[Affiliation] OR "Republic of the Congo"[Affiliation] OR "Kongo"[Affiliation] OR "Brazzaville"[Affiliation] OR "Cote d'Ivoire"[Affiliation] OR "Ivory Coast"[Affiliation] OR "Cote d'Ivoire"[Affiliation] OR "Yamoussoukro"[Affiliation] OR "Abidjan"[Affiliation] OR "Bouake"[Affiliation] OR "Korhogo"[Affiliation] OR "Democratic Republic of the Congo"[Affiliation] OR "Kinshasa"[Affiliation] OR "Zaire"[Affiliation] OR "Republique democratique du Congo"[Affiliation] OR "Djibouti"[Affiliation] OR "Egypt"[Affiliation] OR "Malawi"[Affiliation] OR "Cairo"[Affiliation] OR "Al Minya"[Affiliation] OR "Equatorial Guinea"[Affiliation] OR "Guinee equatoriale"[Affiliation] OR "Malabo"[Affiliation] OR "Eritrea"[Affiliation] OR "Asmara"[Affiliation] OR "Ethiopia"[Affiliation] OR "Ethiopie"[Affiliation] OR "Addis Ababa"[Affiliation] OR "Gabon"[Affiliation] OR "Gabonese Republic"[Affiliation] OR "Libreville"[Affiliation] OR "Gambia"[Affiliation] OR "Gambie"[Affiliation] OR "Banjul"[Affiliation] OR "Ghana"[Affiliation] OR "Accra"[Affiliation] OR "Takoradi"[Affiliation] OR "Sekondi"[Affiliation] OR "Koforidua"[Affiliation] OR "Obuasi"[Affiliation] OR "Kumasi"[Affiliation] OR "Tamale"[Affiliation] OR "Republic of Guinea"[Affiliation] OR "Guinea"[Affiliation] OR "Guinee"[Affiliation] OR "Conakry"[Affiliation] OR "Guinea-Bissau"[Affiliation] OR "Guine-Bissau"[Affiliation] OR "Bissau"[Affiliation] OR "Kenya"[Affiliation] OR "Kenia"[Affiliation] OR "Nairobi"[Affiliation] OR "Mombasa"[Affiliation] OR "Lesotho"[Affiliation] OR "Maseru"[Affiliation] OR "Liberia"[Affiliation] OR "Republic of Liberia"[Affiliation] OR "Liberia"[Affiliation] OR "Libya"[Affiliation] OR "Libya"[Affiliation] OR "Libye"[Affiliation] OR "Libia"[Affiliation] OR "Madagascar"[Affiliation] OR "Madagasikara"[Affiliation] OR "Antananarivo"[Affiliation] OR "Toliara"[Affiliation] OR "Fianarantsoa"[Affiliation] OR "Antsirabe"[Affiliation] OR "Toamasina"[Affiliation] OR "Mahajanga"[Affiliation] OR "Malawi"[Affiliation] OR "Malawi"[Affiliation] OR "Lilongwe"[Affiliation] OR "Mali"[Affiliation] OR "Bamako"[Affiliation] OR "Sikasso"[Affiliation] OR "Koutiala"[Affiliation] OR "Koulikoro"[Affiliation] OR "Segou"[Affiliation] OR "Kayes"[Affiliation] OR |

|                                                                                                                                                                                                                                                                                                                                                                                                                                                                                                                                                                                                                                                                                                                                                                                                                                                                                                                                                                                                                                                                                                                                                                                                                                                                                                                                                                                                                                                                                                                                                                                                                                                                                                                                                                                                                                                                                                                                                                                                                                                                                                                                                                                                                                                                                                      |
|------------------------------------------------------------------------------------------------------------------------------------------------------------------------------------------------------------------------------------------------------------------------------------------------------------------------------------------------------------------------------------------------------------------------------------------------------------------------------------------------------------------------------------------------------------------------------------------------------------------------------------------------------------------------------------------------------------------------------------------------------------------------------------------------------------------------------------------------------------------------------------------------------------------------------------------------------------------------------------------------------------------------------------------------------------------------------------------------------------------------------------------------------------------------------------------------------------------------------------------------------------------------------------------------------------------------------------------------------------------------------------------------------------------------------------------------------------------------------------------------------------------------------------------------------------------------------------------------------------------------------------------------------------------------------------------------------------------------------------------------------------------------------------------------------------------------------------------------------------------------------------------------------------------------------------------------------------------------------------------------------------------------------------------------------------------------------------------------------------------------------------------------------------------------------------------------------------------------------------------------------------------------------------------------------|
| <p>"Mopti"[Affiliation] OR "Mauritania"[Affiliation] OR "Mauritanie"[Affiliation] OR "Nouakchott"[Affiliation] OR "Mauritius"[Affiliation] OR "Ile Maurice"[Affiliation] OR "Morocco"[Affiliation] OR "Morocco"[Affiliation] OR "Maroc"[Affiliation] OR "Marruecos"[Affiliation] OR "Rabat"[Affiliation] OR "casablanca"[Affiliation] OR "Mozambique"[Affiliation] OR "Mosambik"[Affiliation] OR "Mocambique"[Affiliation] OR "Maputo"[Affiliation] OR "Namibia"[Affiliation] OR "Namibie"[Affiliation] OR "Windhoek"[Affiliation] OR "Niger"[Affiliation] OR "Niamey"[Affiliation] OR "Maradi"[Affiliation] OR "Zinder"[Affiliation] OR "Tillaberi"[Affiliation] OR "Tahoua"[Affiliation] OR "Agadez"[Affiliation] OR "Nigeria"[Affiliation] OR "Abuja"[Affiliation] OR "Rwanda"[Affiliation] OR "Ruanda"[Affiliation] OR "Kigali"[Affiliation] OR "Sao Tome"[Affiliation] OR "Sao Tome"[Affiliation] OR "Senegal"[Affiliation] OR "Senegal"[Affiliation] OR "Dakar"[Affiliation] OR "Ziguinchor"[Affiliation] OR "Seychelles"[Affiliation] OR "Sierra Leone"[Affiliation] OR "Somalia"[Affiliation] OR "Somalie"[Affiliation] OR "Mogadishu"[Affiliation] OR "South Africa"[Affiliation] OR "Afrique du Sud"[Affiliation] OR "Pretoria"[Affiliation] OR "Stellenbosch"[Affiliation] OR "Cape Town"[Affiliation] OR "Johannesburg"[Affiliation] OR "South Sudan"[Affiliation] OR "Sudsudan"[Affiliation] OR "Juba"[Affiliation] OR "Sudan"[Affiliation] OR "Soudan"[Affiliation] OR "Khartoum"[Affiliation] OR "Swaziland"[Affiliation] OR "eSwatini"[Affiliation] OR "Mbabane"[Affiliation] OR "Tanzania"[Affiliation] OR "Zanzibar"[Affiliation] OR "Tanganyika"[Affiliation] OR "Tansania"[Affiliation] OR "Tanzanie"[Affiliation] OR "Dodoma"[Affiliation] OR "Togo"[Affiliation] OR "Lome"[Affiliation] OR "Tunisia"[Affiliation] OR "Tunesien"[Affiliation] OR "Tunisie"[Affiliation] OR "Tunis"[Affiliation] OR "Gabes"[Affiliation] OR "Uganda"[Affiliation] OR "Ouganda"[Affiliation] OR "Kampala"[Affiliation] OR "Zambia"[Affiliation] OR "Rhodesia"[Affiliation] OR "Sambia"[Affiliation] OR "Zambie"[Affiliation] OR "Lusaka"[Affiliation] OR "Zimbabwe"[Affiliation] OR "Simbabwe"[Affiliation] OR "Harare"[Affiliation] Filters: from 2019/12 - 2021/3 Sort by: Publication Date</p> |
|------------------------------------------------------------------------------------------------------------------------------------------------------------------------------------------------------------------------------------------------------------------------------------------------------------------------------------------------------------------------------------------------------------------------------------------------------------------------------------------------------------------------------------------------------------------------------------------------------------------------------------------------------------------------------------------------------------------------------------------------------------------------------------------------------------------------------------------------------------------------------------------------------------------------------------------------------------------------------------------------------------------------------------------------------------------------------------------------------------------------------------------------------------------------------------------------------------------------------------------------------------------------------------------------------------------------------------------------------------------------------------------------------------------------------------------------------------------------------------------------------------------------------------------------------------------------------------------------------------------------------------------------------------------------------------------------------------------------------------------------------------------------------------------------------------------------------------------------------------------------------------------------------------------------------------------------------------------------------------------------------------------------------------------------------------------------------------------------------------------------------------------------------------------------------------------------------------------------------------------------------------------------------------------------------|

### 1.2.3. AJOL Search Query

(covid OR coronavirus) AND Africa

**Table S1.** COVID-19 research collaboration between African countries and non-African countries.

[illegible]

Table S2. COVID-19 research collaboration between African countries.

|                 | Central Africa                                                                                                                                                                                                                                                               | Eastern Africa                                                                                                                                                 | North Africa                                                                                                          | Southern Africa                                                                                                        | Western Africa                                                                                                                                                                                           |
|-----------------|------------------------------------------------------------------------------------------------------------------------------------------------------------------------------------------------------------------------------------------------------------------------------|----------------------------------------------------------------------------------------------------------------------------------------------------------------|-----------------------------------------------------------------------------------------------------------------------|------------------------------------------------------------------------------------------------------------------------|----------------------------------------------------------------------------------------------------------------------------------------------------------------------------------------------------------|
|                 | Cameroon<br>Central African Republic<br>Chad<br>Congo<br>D R Congo<br>Equatorial Guinea<br>Gabon                                                                                                                                                                             | Burundi<br>Comoros<br>Eritrea<br>Ethiopia<br>Kenya<br>Madagascar<br>Mauritius<br>Rwanda<br>Seychelles<br>Somalia<br>South Sudan<br>Sudan<br>Tanzania<br>Uganda | Algeria<br>Djibouti<br>Egypt<br>Libya<br>Morocco<br>Tunisia                                                           | Angola<br>Botswana<br>Lesotho<br>Malawi<br>Mozambique<br>Namibia<br>South Africa<br>Swaziland<br>Zambia<br>Zimbabwe    | Benin<br>Burkina Faso<br>Ghana<br>Guinea<br>Guinea-Bissau<br>Ivory Coast<br>Liberia<br>Mali<br>Mauritania<br>Niger<br>Nigeria<br>Senegal<br>Sierra Leone<br>The Gambia<br>Togo                           |
| Central Africa  | Cameroon 127<br>Central African Republic 5 5<br>Chad 5<br>Congo 2 2 43<br>D R Congo 7 1 2 81<br>Equatorial Guinea 3<br>Gabon 1 1 22                                                                                                                                          |                                                                                                                                                                |                                                                                                                       |                                                                                                                        |                                                                                                                                                                                                          |
| Eastern Africa  | Burundi 1<br>Comoros<br>Eritrea<br>Ethiopia 5 1 2 2<br>Kenya 13 2 9<br>Madagascar 3 2 2 1 1<br>Mauritius 1<br>Rwanda 4 6<br>Seychelles<br>Somalia 1<br>South Sudan<br>Sudan 2 1<br>Tanzania 6 2 4 2<br>Uganda 9 1 6                                                          | 5<br>2<br>4<br>322<br>2 14 289<br>2 4 29<br>3 1 32<br>4 10 51<br>1 1 2<br>1 12<br>1 1 4<br>3 5 113<br>5 14 7 1 3 89<br>10 29 7 3 4 17 169                      |                                                                                                                       |                                                                                                                        |                                                                                                                                                                                                          |
| North Africa    | Algeria 1<br>Djibouti<br>Egypt 9 2<br>Libya<br>Morocco 2<br>Tunisia 1                                                                                                                                                                                                        | 3 1 4<br>5 16 1 3 1 19 6 10<br>4<br>2 5 1 1 1 6 1 3<br>4 1 6 4 11                                                                                              | 113<br>3<br>18 1 1220<br>2 9 56<br>18 21 366<br>28 2 12 159                                                           |                                                                                                                        |                                                                                                                                                                                                          |
| Southern Africa | Angola<br>Botswana 2<br>Lesotho<br>Malawi 2 1 1 1<br>Mozambique 2 4<br>Namibia 1<br>South Africa 19 1 9 19 1<br>Swaziland 1<br>Zambia 3 4 4<br>Zimbabwe 4 3 1 1                                                                                                              | 1 4 1 1<br>1<br>3 11 3 1<br>4 4 1 1 3 1 1<br>3 1<br>13 62 4 6 14 1<br>1 1<br>4 10 2 1<br>4 11 2<br>3 4 10                                                      | 5<br>1 2 7<br>3 5 8<br>1 2<br>11 17 31<br>1<br>4 6 9<br>3 4 10                                                        | 3<br>29<br>3<br>3 1 57<br>1 2 65<br>2 2 17<br>8 2 15 11 41452<br>1 1 2 11<br>3 6 2 13 1 57<br>7 2<br>3 4 3 1 32 1 4 91 |                                                                                                                                                                                                          |
| Western Africa  | Benin 3 1 4 2<br>Burkina Faso 3 3 4 1 2<br>Ghana 13 2 5 3 2<br>Guinea 4 1 1 3<br>Guinea-Bissau 1 1<br>Ivory Coast 6 1 1 1<br>Liberia 1 2<br>Mali 2 4<br>Mauritania 2 1<br>Niger 4 2 2<br>Nigeria 11 2 6<br>Senegal 8 2 1 2 4<br>Sierra Leone 1<br>The Gambia 1<br>Togo 1 1 4 | 1 2 1<br>2 5 3<br>7 19 2 1 6<br>1 1 1<br>2 1<br>1 1 1<br>4 2<br>19 43 1 2 9<br>4 6 4 2<br>3<br>1 2<br>1 1 2<br>1 1 2                                           | 1 1 1 2 1<br>1 1 2 1<br>3 11 4 6<br>2 3<br>1<br>1 2<br>1<br>1 2<br>4 36 5 7 16<br>2 2 1<br>2 3 2<br>1 2<br>1 2<br>1 1 | 3<br>3 2 1<br>1 1 57<br>2 2 65<br>2 2 17<br>8 2 15 11 41452<br>1 1 2 11<br>3 6 2 13 1 57<br>7 2<br>3 4 3 1 32 1 4 91   | 27<br>2 35<br>4 1 234<br>6 5 2 21<br>2 1 1 6<br>1 2 4 2 21<br>2 1 9<br>2 3 1 1 41<br>1 1 1 6<br>2 2 2 1 1 15<br>4 1 32 2 4 2 2 757<br>3 7 7 4 1 6 1 2 1 9 88<br>4 1<br>1 1 1<br>1 1 2 2 1 1 1 1 23<br>10 |
